# Supplementary material for: VEGFA Haplotype and VEGF-A and VEGF-R2 Protein Associations with Exudative Age-Related Macular Degeneration
Source: MDPI journal article supplement (doi:10.3390/cells11060996), 2022-03-15
Supplement: s1 [file s1]

# Supplementary material 1.

**Table S1.** Frequencies of *VEGFA* (rs1570360, rs699947, rs3025033 and rs2146323) genotypes and alleles in females with early AMD and exudative AMD, and controls

| <i>SNP</i><br><i>Genotype/allele</i> | <i>Early AMD</i><br><i>N=235</i><br><i>n (%)</i> | <i>Exudative</i><br><i>AMD</i><br><i>N=270</i><br><i>n (%)</i> | <i>Control</i><br><i>group</i><br><i>N=235</i><br><i>n (%)</i> | <i>p value*</i> | <i>p value**</i> | <i>p value***</i> |
|--------------------------------------|--------------------------------------------------|----------------------------------------------------------------|----------------------------------------------------------------|-----------------|------------------|-------------------|
| rs1570360                            |                                                  |                                                                |                                                                |                 |                  |                   |
| GG                                   | 115 (48.9)                                       | 119 (44.1)                                                     | 108 (46)                                                       | 0.142           | 0.285            | 0.498             |
| AG                                   | 88 (37.4)                                        | 107 (39.6)                                                     | 79 (33.6)                                                      |                 |                  |                   |
| AA                                   | 32 (13.6)                                        | 44 (16.3)                                                      | 48 (20.4)                                                      |                 |                  |                   |
| G                                    | 318 (67.7)                                       | 345 (63.9)                                                     | 295 (62.8)                                                     | 0.097           | 0.646            | 0.208             |
| A                                    | 152 (32.3)                                       | 195 (36.1)                                                     | 177 (37.2)                                                     |                 |                  |                   |
| rs699947                             |                                                  |                                                                |                                                                |                 |                  |                   |
| AA                                   | 61 (26)                                          | 81 (30)                                                        | 70 (29.8)                                                      | 0.618           | 0.490            | 0.182             |
| AC                                   | 122 (51.9)                                       | 118 (43.7)                                                     | 113 (48.1)                                                     |                 |                  |                   |
| CC                                   | 52 (22.1)                                        | 71 (26.3)                                                      | 52 (22.1)                                                      |                 |                  |                   |
| A                                    | 244 (51.9)                                       | 280 (51.8)                                                     | 253 (53.8)                                                     | 0.556           | 0.530            | 0.984             |
| C                                    | 226 (48.1)                                       | 260 (48.1)                                                     | 217 (46.2)                                                     |                 |                  |                   |
| rs3025033                            |                                                  |                                                                |                                                                |                 |                  |                   |
| AA                                   | 148 (63)                                         | 199 (73.3)                                                     | 147 (62.6)                                                     | 0.374           | <b>0.017</b>     | <b>0.032</b>      |
| AG                                   | 80 (34)                                          | 64 (23.7)                                                      | 75 (31.9)                                                      |                 |                  |                   |
| GG                                   | 7 (3)                                            | 7 (2.6)                                                        | 13 (5.5)                                                       |                 |                  |                   |
| A                                    | 376 (80)                                         | 462 (85.6)                                                     | 369 (78.5)                                                     | 0.573           | <b>0.003</b>     | <b>0.019</b>      |
| G                                    | 94 (20)                                          | 78 (14.4)                                                      | 101 (21.5)                                                     |                 |                  |                   |
| rs2146323                            |                                                  |                                                                |                                                                |                 |                  |                   |
| CC                                   | 96 (40.9)                                        | 124 (45.9)                                                     | 92 (39.1)                                                      | 0.560           | 0.308            | 0.299             |
| AC                                   | 111 (47.2)                                       | 109 (40.4)                                                     | 107 (45.5)                                                     |                 |                  |                   |
| AA                                   | 28 (11.9)                                        | 37 (13.7)                                                      | 36 (15.3)                                                      |                 |                  |                   |
| C                                    | 303 (64.5)                                       | 357 (66.1)                                                     | 291 (61.9)                                                     | 0.417           | 0.165            | 0.584             |
| A                                    | 167 (35.5)                                       | 183 (33.9)                                                     | 179 (38.1)                                                     |                 |                  |                   |

*p* – significance level and Bonferroni corrected significance level when  $p < 0.05/4$ ; \*Early AMD vs. Control group;

\*\*Exudative AMD vs. Control group;

\*\*\*Early AMD vs. Exudative AMD.

**Table S2.** Binomial logistic regression analysis of *VEGFA* (rs1570360, rs699947, rs3025033, and rs2146323) in females with early and exudative AMD and controls

| <i>rs1570360</i>                   |                        |                    |                |            |                                        |                |            |
|------------------------------------|------------------------|--------------------|----------------|------------|----------------------------------------|----------------|------------|
| <i>Early AMD vs. Control group</i> |                        |                    |                |            | <i>Exudative AMD vs. Control group</i> |                |            |
| <i>Model</i>                       | <i>Genotype/allele</i> | <i>OR (95% CI)</i> | <i>p value</i> | <i>AIC</i> | <i>OR (95% CI)*</i>                    | <i>p value</i> | <i>AIC</i> |
| <b>rs1570360</b>                   |                        |                    |                |            |                                        |                |            |
| Codominant                         | G/G                    | 1.00               |                |            | 1.00                                   |                |            |
|                                    | A/G                    | 1.05 (0.70-1.56)   | 0.826          | 653.6      | 1.10 (0.73-1.67)                       | 0.648          | 647.1      |
|                                    | A/A                    | 0.63 (0.37-1.05)   | 0.077          |            | 0.89 (0.53-1.48)                       | 0.640          |            |
| Dominant                           | G/G                    | 1.00               |                |            | 1.00                                   |                |            |
|                                    | A/G-A/A                | 0.89 (0.62-1.27)   | 0.52           | 655.1      | 1.02 (0.70-1.48)                       | 0.91           | 645.8      |
| Recessive                          | G/G-A/G                | 1.00               |                |            | 1.00                                   |                |            |
|                                    | A/A                    | 0.61 (0.38-1.00)   | <b>0.049</b>   | 651.7      | 0.85 (0.53-1.37)                       | 0.5            | 645.3      |
| Overdominant                       | G/G-A/A                | 1.00               |                |            | 1.00                                   |                |            |
|                                    | A/G                    | 1.18 (0.81-1.73)   | 0.39           | 654.8      | 1.14 (0.78-1.68)                       | 0.5            | 645.4      |
| Additive                           | A                      | 0.84 (0.66-1.07)   | 0.15           | 653.5      | 0.97 (0.76-1.24)                       | 0.79           | 645.7      |
| <b>rs699947</b>                    |                        |                    |                |            |                                        |                |            |
| Codominant                         | A/A                    | 1.00               |                |            | 1.00                                   |                |            |
|                                    | A/C                    | 1.24 (0.81-1.90)   | 0.327          | 656.6      | 0.82 (0.53-1.28)                       | 0.387          | 643.6      |
|                                    | C/C                    | 1.15 (0.69-1.92)   | 0.601          |            | 1.35 (0.81-2.24)                       | 0.256          |            |
| Dominant                           | A/A                    | 1.00               |                |            | 1.00                                   |                |            |
|                                    | A/C-C/C                | 1.21 (0.81-1.81)   | 0.35           | 654.7      | 0.98 (0.65-1.46)                       | 0.91           | 645.8      |
| Recessive                          | A/A-A/C                | 1.00               |                |            | 1.00                                   |                |            |
|                                    | C/C                    | 1.00 (0.65-1.55)   | 1              | 655.6      | 1.51 (0.97-2.34)                       | 0.064          | 642.4      |
| Overdominant                       | A/A-C/C                | 1.00               |                |            | 1.00                                   |                |            |
|                                    | A/C                    | 1.17 (0.81-1.67)   | 0.41           | 654.9      | 0.72 (0.50-1.05)                       | 0.09           | 642.9      |
| Additive                           | C                      | 1.08 (0.84-1.40)   | 0.56           | 655.2      | 1.14 (0.88-1.46)                       | 0.32           | 644.8      |
| <b>rs3025033</b>                   |                        |                    |                |            |                                        |                |            |
| Codominant                         | A/A                    | 1.00               |                |            | 1.00                                   |                |            |

|              |         |                  |       |       |                  |               |       |
|--------------|---------|------------------|-------|-------|------------------|---------------|-------|
|              | A/G     | 1.06 (0.72-1.56) | 0.771 | 655.6 | 0.57 (0.37-0.87) | <b>0.009</b>  | 638.7 |
|              | G/G     | 0.53 (0.21-1.38) | 0.195 |       | 0.42 (0.15-1.12) | 0.083         |       |
| Dominant     | A/A     | 1.00             |       |       | 1.00             |               |       |
|              | A/G-G/G | 0.98 (0.68-1.43) | 0.92  | 655.5 | 0.55 (0.37-0.82) | <b>0.0032</b> | 637.1 |
| Recessive    | A/A-A/G | 1.00             |       |       | 1.00             |               |       |
|              | G/G     | 0.52 (0.21-1.34) | 0.17  | 653.7 | 0.49 (0.18-1.31) | 0.15          | 643.7 |
| Overdominant | A/A-G/G | 1.00             |       |       | 1.00             |               |       |
|              | A/G     | 1.10 (0.75-1.62) | 0.62  | 655.3 | 0.60 (0.39-0.91) | <b>0.015</b>  | 639.9 |
| Additive     | G       | 0.91 (0.67-1.25) | 0.57  | 655.2 | 0.60 (0.42-0.84) | <b>0.0028</b> | 636.9 |

**rs2146323**

|              |         |                  |       |       |                  |              |       |
|--------------|---------|------------------|-------|-------|------------------|--------------|-------|
| Codominant   | C/C     | 1.00             |       |       | 1.00             |              |       |
|              | A/C     | 0.99 (0.67-1.47) | 0.977 | 656.4 | 0.65 (0.44-0.98) | <b>0.040</b> | 642.9 |
|              | A/A     | 0.75 (0.42-1.32) | 0.313 |       | 0.65 (0.37-1.14) | 0.135        |       |
| Dominant     | C/C     | 1.00             |       |       | 1.00             |              |       |
|              | A/C-A/A | 0.93 (0.64-1.35) | 0.71  | 655.4 | 0.65 (0.45-0.95) | <b>0.026</b> | 640.9 |
| Recessive    | C/C-A/C | 1.00             |       |       | 1.00             |              |       |
|              | A/A     | 0.75 (0.44-1.27) | 0.28  | 654.4 | 0.80 (0.47-1.36) | 0.42         | 645.1 |
| Overdominant | C/C-A/A | 1.00             |       |       | 1.00             |              |       |
|              | A/C     | 1.07 (0.75-1.54) | 0.71  | 655.4 | 0.73 (0.50-1.06) | 0.1          | 643.1 |
| Additive     | A       | 0.90 (0.69-1.17) | 0.42  | 654.9 | 0.77 (0.59-1.00) | 0.049        | 641.9 |

OR – odds ratio; CI – confident interval; *p* – significance level and Bonferroni corrected significance level when *p*<0.05/4; AIC – Akaike information criteria; \*ORs adjusted for age in exudative AMD analysis.

**Table S3.** Frequencies of *VEGFA* (rs1570360, rs699947, rs3025033, and rs2146323) genotypes and alleles in males with early AMD and exudative AMD, and controls

| <i>SNP</i><br><i>Genotype/allele</i> | <i>Early AMD</i><br><i>N=104</i><br><i>n (%)</i> | <i>Exudative</i><br><i>AMD</i><br><i>N=149</i><br><i>n (%)</i> | <i>Control</i><br><i>group</i><br><i>N=139</i><br><i>n (%)</i> | <i>p value*</i> | <i>p value**</i> | <i>p value***</i> |
|--------------------------------------|--------------------------------------------------|----------------------------------------------------------------|----------------------------------------------------------------|-----------------|------------------|-------------------|
| rs1570360                            |                                                  |                                                                |                                                                |                 |                  |                   |
| GG                                   | 47 (45.2)                                        | 64 (43)                                                        | 69 (49.6)                                                      | 0.684           | 0.378            | 0.920             |
| AG                                   | 40 (38.5)                                        | 61 (40.9)                                                      | 46 (33.1)                                                      |                 |                  |                   |
| AA                                   | 17 (16.3)                                        | 24 (16.1)                                                      | 24 (17.3)                                                      |                 |                  |                   |
| G                                    | 134 (64.4)                                       | 189 (63.4)                                                     | 184 (66.2)                                                     | 0.686           | 0.488            | 0.818             |
| A                                    | 74 (35.6)                                        | 109 (36.6)                                                     | 94 (33.8)                                                      |                 |                  |                   |
| rs699947                             |                                                  |                                                                |                                                                |                 |                  |                   |
| AA                                   | 25 (24)                                          | 38 (25.5)                                                      | 42 (30.2)                                                      | 0.488           | 0.671            | 0.844             |
| AC                                   | 52 (50)                                          | 69 (46.3)                                                      | 60 (43.2)                                                      |                 |                  |                   |
| CC                                   | 27 (26)                                          | 42 (28.2)                                                      | 37 (26.6)                                                      |                 |                  |                   |
| A                                    | 102 (49)                                         | 145 (48.7)                                                     | 144 (51.8)                                                     | 0.512           | 0.451            | 0.933             |
| C                                    | 106 (51)                                         | 153 (51.3)                                                     | 134 (48.2)                                                     |                 |                  |                   |
| rs3025033                            |                                                  |                                                                |                                                                |                 |                  |                   |
| AA                                   | 67 (64.4)                                        | 91 (61.1)                                                      | 81 (58.3)                                                      | 0.623           | 0.756            | 0.775             |
| AG                                   | 32 (30.8)                                        | 52 (34.9)                                                      | 50 (36)                                                        |                 |                  |                   |
| GG                                   | 5 (4.8)                                          | 6 (4)                                                          | 8 (5.8)                                                        |                 |                  |                   |
| A                                    | 166 (79.8)                                       | 234 (78.5)                                                     | 212 (76.3)                                                     | 0.352           | 0.516            | 0.727             |
| G                                    | 42 (20.2)                                        | 64 (21.5)                                                      | 66 (23.7)                                                      |                 |                  |                   |
| rs2146323                            |                                                  |                                                                |                                                                |                 |                  |                   |
| CC                                   | 46 (44.2)                                        | 67 (45)                                                        | 66 (47.5)                                                      | 0.333           | 0.744            | 0.701             |
| AC                                   | 46 (44.2)                                        | 60 (40.3)                                                      | 50 (36)                                                        |                 |                  |                   |
| AA                                   | 12 (11.5)                                        | 22 (14.8)                                                      | 23 (16.5)                                                      |                 |                  |                   |
| C                                    | 138 (66.3)                                       | 194 (65.1)                                                     | 182 (65.5)                                                     | 0.840           | 0.926            | 0.831             |
| A                                    | 70 (33.7)                                        | 104 (34.9)                                                     | 96 (34.5)                                                      |                 |                  |                   |

*p* – significance level and Bonferroni corrected significance level when  $p < 0.05/4$ ;

\*Early AMD vs. Control group;

\*\*Exudative AMD vs. Control group;

\*\*\*Early AMD vs. Exudative AMD.

**Table S4.** Binomial logistic regression analysis of *VEGFA* (rs1570360, rs699947, rs3025033, and rs2146323) in males with early and exudative AMD and controls

| <i>rs1570360</i>                   |                        |                    |                |            |                                        |                |            |
|------------------------------------|------------------------|--------------------|----------------|------------|----------------------------------------|----------------|------------|
| <i>Early AMD vs. Control group</i> |                        |                    |                |            | <i>Exudative AMD vs. Control group</i> |                |            |
| <i>Model</i>                       | <i>Genotype/allele</i> | <i>OR (95% CI)</i> | <i>p value</i> | <i>AIC</i> | <i>OR (95% CI)*</i>                    | <i>p value</i> | <i>AIC</i> |
| <b>rs1570360</b>                   |                        |                    |                |            |                                        |                |            |
| Codominant                         | G/G                    | 1.00               |                |            | 1.00                                   |                |            |
|                                    | A/G                    | 1.28 (0.73-2.24)   | 0.395          | 337.1      | 1.49 (0.89-2.49)                       | 0.132          | 400.3      |
|                                    | A/A                    | 1.04 (0.50-2.14)   | 0.916          |            | 1.08 (0.56-2.10)                       | 0.815          |            |
| Dominant                           | G/G                    | 1.00               |                |            | 1.00                                   |                |            |
|                                    | A/G-A/A                | 1.20 (0.72-1.99)   | 0.49           | 335.3      | 1.35 (0.84-2.15)                       | 0.21           | 399.1      |
| Recessive                          | G/G-A/G                | 1.00               |                |            | 1.00                                   |                |            |
|                                    | A/A                    | 0.94 (0.47-1.85)   | 0.85           | 335.8      | 0.91 (0.49-1.69)                       | 0.76           | 400.6      |
| Overdominant                       | G/G-A/A                | 1.00               |                |            | 1.00                                   |                |            |
|                                    | A/G                    | 1.26 (0.74-2.15)   | 0.39           | 335.1      | 1.46 (0.90-2.36)                       | 0.13           | 398.3      |
| Additive                           | A                      | 1.07 (0.76-1.50)   | 0.71           | 335.7      | 1.12 (0.81-1.54)                       | 0.49           | 400.2      |
| <b>rs699947</b>                    |                        |                    |                |            |                                        |                |            |
| Codominant                         | A/A                    | 1.00               |                |            | 1.00                                   |                |            |
|                                    | A/C                    | 1.46 (0.78-2.70)   | 0.234          | 336.       | 1.25 (0.72-2.20)                       | 0.428          | 402        |
|                                    | C/C                    | 1.23 (0.61-2.47)   | 0.569          |            | 1.24 (0.66-2.32)                       | 0.505          |            |
| Dominant                           | A/A                    | 1.00               |                |            | 1.00                                   |                |            |
|                                    | A/C-C/C                | 1.37 (0.77-2.44)   | 0.28           | 334.7      | 1.25 (0.74-2.10)                       | 0.4            | 400        |
| Recessive                          | A/A-A/C                | 1.00               |                |            | 1.00                                   |                |            |
|                                    | C/C                    | 0.97 (0.54-1.72)   | 0.91           | 335.8      | 1.08 (0.64-1.82)                       | 0.78           | 400.6      |
| Overdominant                       | A/A-C/C                | 1.00               |                |            | 1.00                                   |                |            |
|                                    | A/C                    | 1.32 (0.79-2.19)   | 0.29           | 334.7      | 1.13 (0.71-1.80)                       | 0.61           | 400.4      |

|                  |         |                  |       |       |                  |       |       |
|------------------|---------|------------------|-------|-------|------------------|-------|-------|
| Additive         | C       | 1.11 (0.78-1.57) | 0.56  | 335.5 | 1.11 (0.81-1.52) | 0.5   | 400.2 |
| <b>rs3025033</b> |         |                  |       |       |                  |       |       |
| Codominant       | A/A     | 1.00             |       |       | 1.00             |       |       |
|                  | A/G     | 0.77 (0.45-1.34) | 0.360 | 336.9 | 0.90 (0.55-1.48) | 0.690 | 402   |
|                  | G/G     | 0.76 (0.24-2.42) | 0.637 |       | 0.67 (0.22-2.00) | 0.468 |       |
| Dominant         | A/A     | 1.00             |       |       | 1.00             |       |       |
|                  | A/G-G/G | 0.77 (0.46-1.30) | 0.33  | 334.9 | 0.87 (0.54-1.40) | 0.57  | 400.3 |
| Recessive        | A/A-A/G | 1.00             |       |       | 1.00             |       |       |
|                  | G/G     | 0.83 (0.26-2.61) | 0.74  | 335.7 | 0.69 (0.23-2.05) | 0.5   | 400.2 |
| Overdominant     | A/A-G/G | 1.00             |       |       | 1.00             |       |       |
|                  | A/G     | 0.79 (0.46-1.36) | 0.4   | 335.1 | 0.93 (0.57-1.52) | 0.78  | 400.6 |
| Additive         | G       | 0.82 (0.53-1.26) | 0.36  | 335   | 0.86 (0.58-1.28) | 0.47  | 400.1 |
| <b>rs2146323</b> |         |                  |       |       |                  |       |       |
| Codominant       | C/C     | 1.00             |       |       | 1.00             |       |       |
|                  | A/C     | 1.32 (0.76-2.29) | 0.322 | 335.6 | 1.19 (0.72-1.98) | 0.502 | 402.1 |
|                  | A/A     | 0.75 (0.34-1.65) | 0.474 |       | 0.98 (0.50-1.93) | 0.949 |       |
| Dominant         | C/C     | 1.00             |       |       | 1.00             |       |       |
|                  | A/C-A/A | 1.14 (0.68-1.90) | 0.61  | 335.6 | 1.12 (0.70-1.79) | 0.62  | 400.4 |
| Recessive        | C/C-A/C | 1.00             |       |       | 1.00             |       |       |
|                  | A/A     | 0.66 (0.31-1.39) | 0.27  | 334.6 | 0.90 (0.48-1.71) | 0.76  | 400.6 |
| Overdominant     | C/C-A/A | 1.00             |       |       | 1.00             |       |       |
|                  | A/C     | 1.41 (0.84-2.37) | 0.19  | 334.1 | 1.20 (0.74-1.93) | 0.46  | 400.1 |
| Additive         | A       | 0.97 (0.68-1.38) | 0.85  | 335.8 | 1.03 (0.75-1.42) | 0.86  | 400.6 |

OR – odds ratio; CI – confident interval; p – significance level and Bonferroni corrected significance level when  $p < 0.05/4$ ; AIC – Akaike information criteria; \*ORs adjusted for age in exudative AMD analysis.
